# Supplementary material for: ADAM17 variant causes hair loss via ubiquitin ligase TRIM47–mediated degradation
Source: JCI journal article supplement (doi:10.1172/jci.insight.177588), 2024-05-21
Supplement: sd1 [file 1]

## Supplementary Materials for

*ADAM17* variant causes hair loss via ubiquitin ligase TRIM47 mediated degradation.

\***Correspondence:**      mingli@fudan.edu.cn;      zhanghui@xinquamed.com.cn;  
zhangsi@fudan.edu.cn

### Table of contents

|                         |       |
|-------------------------|-------|
| Supporting Fig. 1.....  | 2-3   |
| Supporting Fig. 2.....  | 4     |
| Supporting Fig. 3.....  | 4-5   |
| Supporting Fig. 4.....  | 6-7   |
| Supporting Fig. 5.....  | 7-8   |
| Supporting Fig. 6.....  | 8-9   |
| Supporting Fig. 7.....  | 9-10  |
| Supporting Fig. 8.....  | 10-11 |
| Supporting Table 1..... | 12-15 |
| Supporting Table 2..... | 15-18 |
| Supporting Table 3..... | 18-20 |
| Supporting Table 4..... | 21-23 |
| Reference.....          | 24    |

## Supporting Figures and Figure Legends

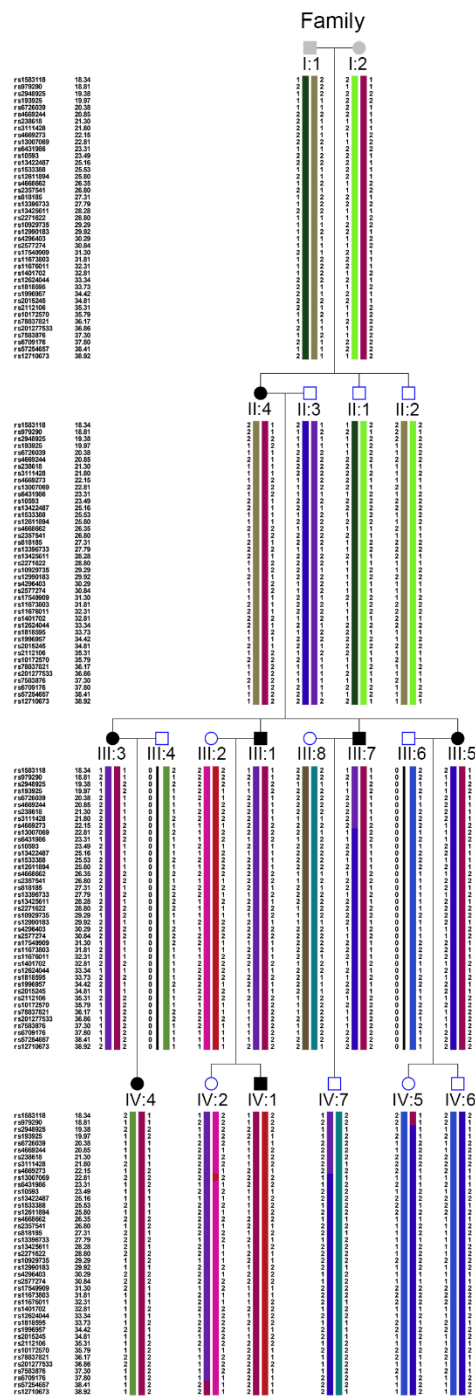

**Supporting Fig. 1** *ADAM17* variants leads to autosomal dominant hypotrichosis with woolly hair.

Haplotype analysis narrowed the candidate region to 19.6cM between markers

rs979290 and rs57254657, which contained 126 annotated genes.

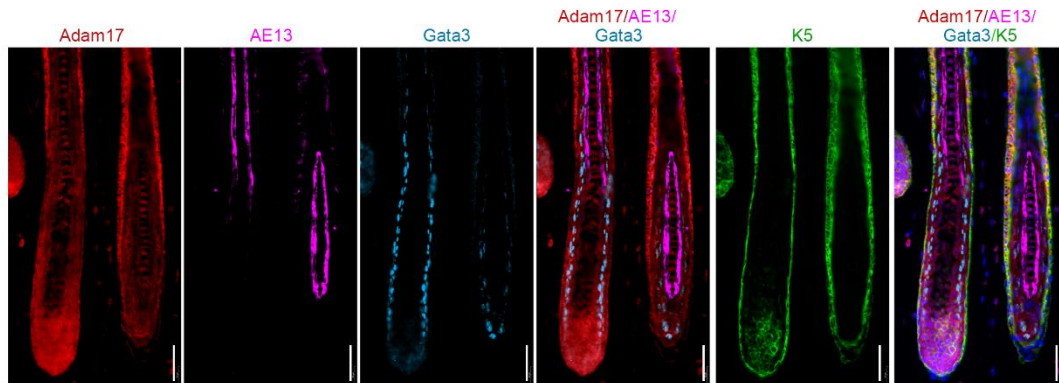

**Supporting Fig. 2 Adam17 exhibits high expression in the hair follicles of mice.**

Immunofluorescence demonstrated that Adam17 was predominantly expressed in the hair cortex, inner root sheath (IRS), and outer root sheath (ORS) of mice hair follicle. The Gata3 antibody was utilized to label the IRS, while the AE13 antibody was employed to label the keratins in the hair cortex. Additionally, the K5 antibody was used to label the ORS. Scale bars, 40  $\mu$ m.

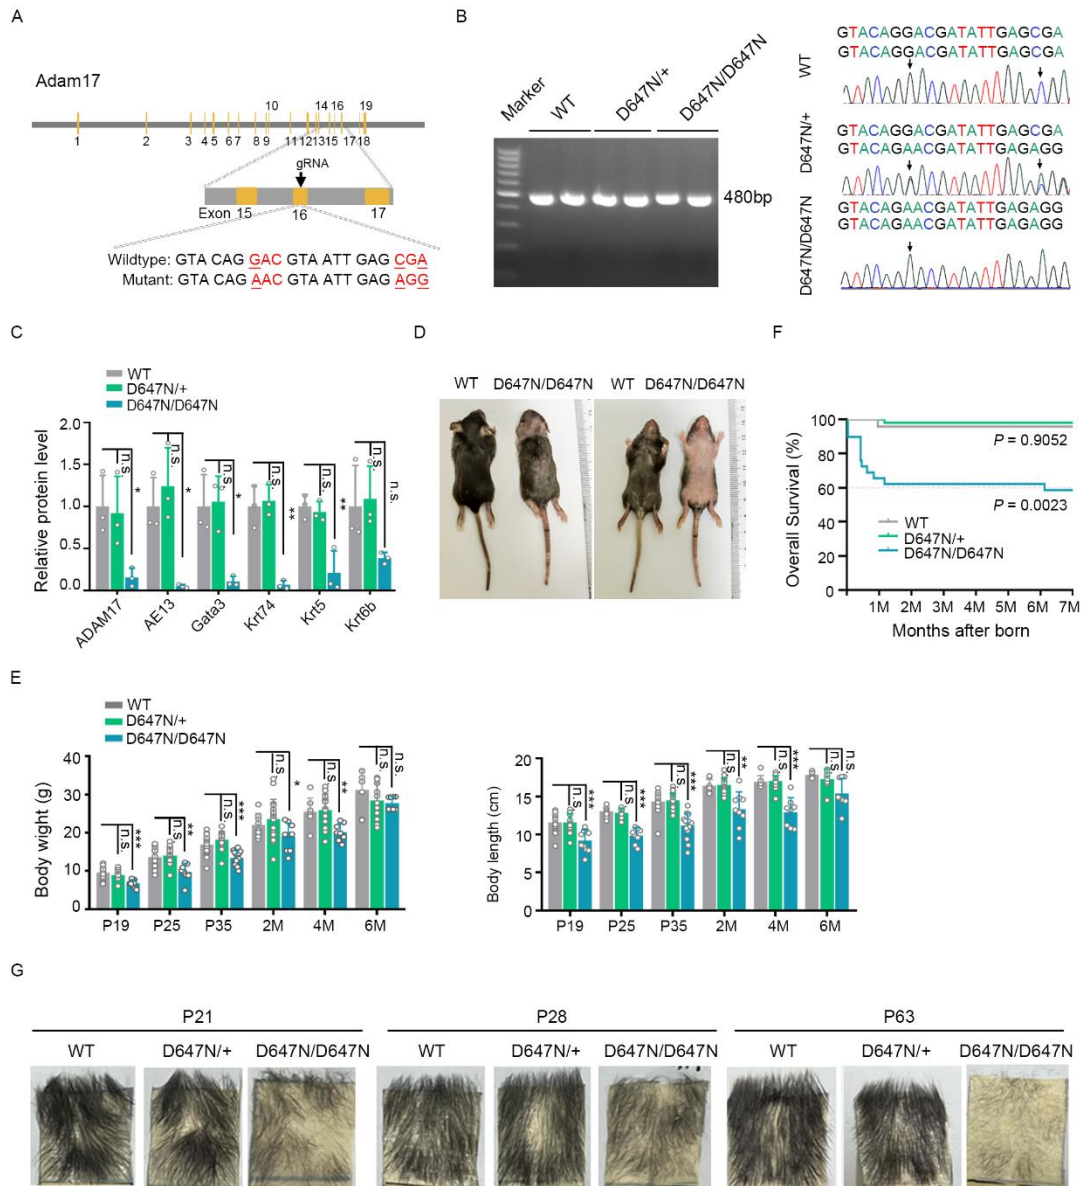

**Supporting Fig. 3 *Adam17* (p.D647N) variant leads to developmental delay and severe skin inflammation in mice.**

(A) Schematic diagram of the strategy to generate mouse model with ADAM17 point mutation by CRISPR/Cas9 mediated genome engineering. The p.D647N (GAC to AAC) in donor oligo was introduced into exon 16 by homology-directed repair. One synonymous mutations p.R651 (CGA to AGG) would also be introduced to prevent the binding and re-cutting of the sequence by gRNA after homology-directed repair. (B)

Genotype were identified by PCR followed by sequence analysis. Both wild-type and mutant mice had 480 bp band. Subsequently, the mouse genotype was confirmed using Sanger sequencing. (WT) wild-type littermates; (D647N/+) heterozygous mice; (D647N/D647N) homozygous mice. (C) Quantification of the immunoblotting results corresponding to Figure 2H showing a substantial decrease in IRS markers within the hair follicles of *Adam17<sup>D647N/D647N</sup>* mice. (n = 3 biological replicates). (D) *Adam17<sup>D647N/D647N</sup>* mice showed severe skin inflammation. (E) *Adam17* (p.D647N) variants led to developmental delay in mice. Left panel: quantification of mice weight. Right panel: quantification of mice length. (n = 8-29 biological replicates). (F) *Adam17* (p.D647N) variants was associated with significantly worse overall survival of mice. *Adam17<sup>D647N/D647N</sup>* mice might die within the first month after birth due to either hydrocephalus or severe skin inflammation. (n = 23-51 biological replicates). (G) Tape was affixed to the hair coat and peeled off during different hair cycles. All experiments were repeated three times. Results were expressed as mean  $\pm$  SD; n.s., not significant; \* $P < 0.05$ ; \*\* $P < 0.01$ ; \*\*\* $P < 0.001$ ; One-way ANOVA test (C, E); Kruskal-Wallis test (E); Brown-Forsythe and Welch ANOVA tests (E); log-rank t test (F).

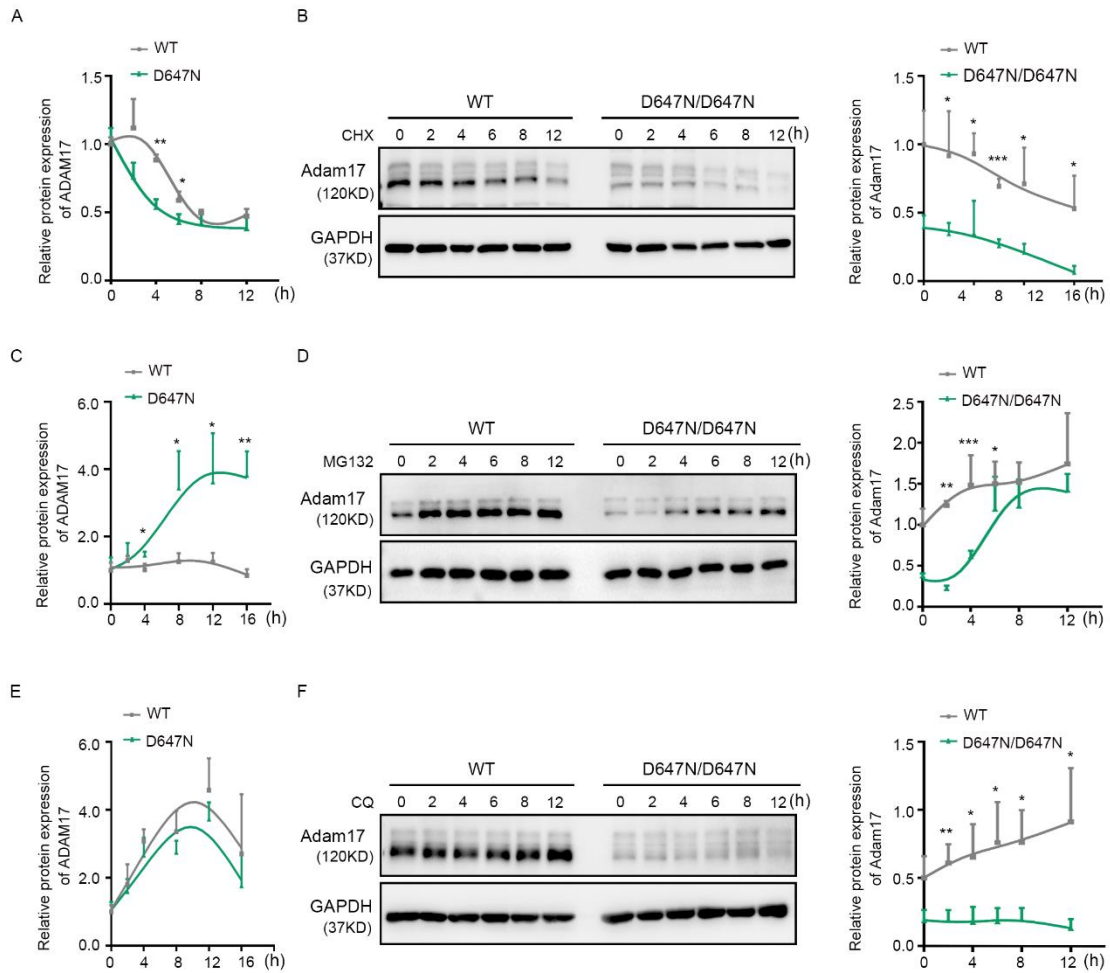

**Supporting Fig. 4 *Adam17* (p.D647N) variant decreases its protein stability owing to enhanced auto-ubiquitination.**

(A) Quantification of the immunoblotting results corresponding to Figure 4G. (n = 3 biological replicates). (B) Cycloheximide (CHX) chase analysis showed that *Adam17* (p.D674N) mutation induced rapid degradation of Adam17 in primary mouse fibroblasts cells. (n = 3 biological replicates) (C) Quantification of the immunoblotting results corresponding to Figure 4H. (n = 3 biological replicates). (D) *Adam17* (p.D647N) mutation resulted in heightened degradation of Adam17 though proteasome pathway in primary mouse fibroblasts cells. (n = 3 biological replicates) (E) Quantification of

the immunoblotting results corresponding to Figure 4I. (n = 3 biological replicates). (F) *Adam17* (p.D647N) mutation had no bearing on the degradation of Adam17 through the autophagy pathway in primary mouse fibroblasts cells. (n = 3 biological replicates). All experiments were repeated three times. Results were expressed as mean  $\pm$  SD, n.s., not significant; \* $P < 0.05$ ; \*\* $P < 0.01$ ; \*\*\* $P < 0.001$ , Unpaired two-tailed t test (A, B, C, D, E, F); Mann-Whitney test (B, D, E, F).

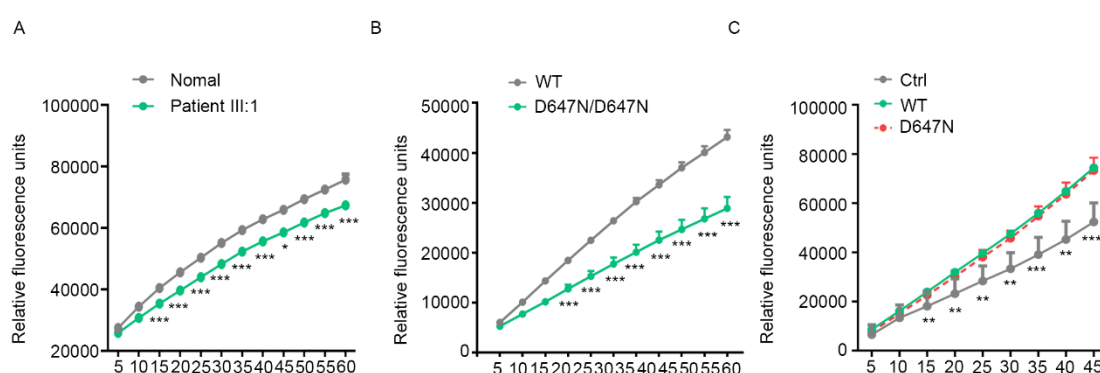

**Supporting Fig. 5 ADAM17 (p.D647N) variant does not impact its shedding activity.**

(A) The shedding activity of ADAM17 in patients' scalp tissue was significantly lower than that in normal controls. (n = 4 biological replicates) (B) The shedding activity of Adam17 in primary cultured mouse skin fibroblast cells from Adam17<sup>D647N/D674N</sup> mice was significantly reduced compared to the wild-type mice (n = 5-6 biological replicates). (C) No significant difference in the shedding activity of ADAM17 between the wildtype and ADAM17 (p.D647N) mutant HaCaT cells (n = 6 biological replicates). All experiments were repeated three times. Results were expressed as mean  $\pm$  SD, n.s., not significant; \*\* $P < 0.01$ ; \*\*\* $P < 0.001$ , Unpaired two-tailed t test (A, B); Mann-

Whitney test (A); Unpaired t test with Welch's correction (B); One-way ANOVA(C); Kruskal-Wallis test (C).

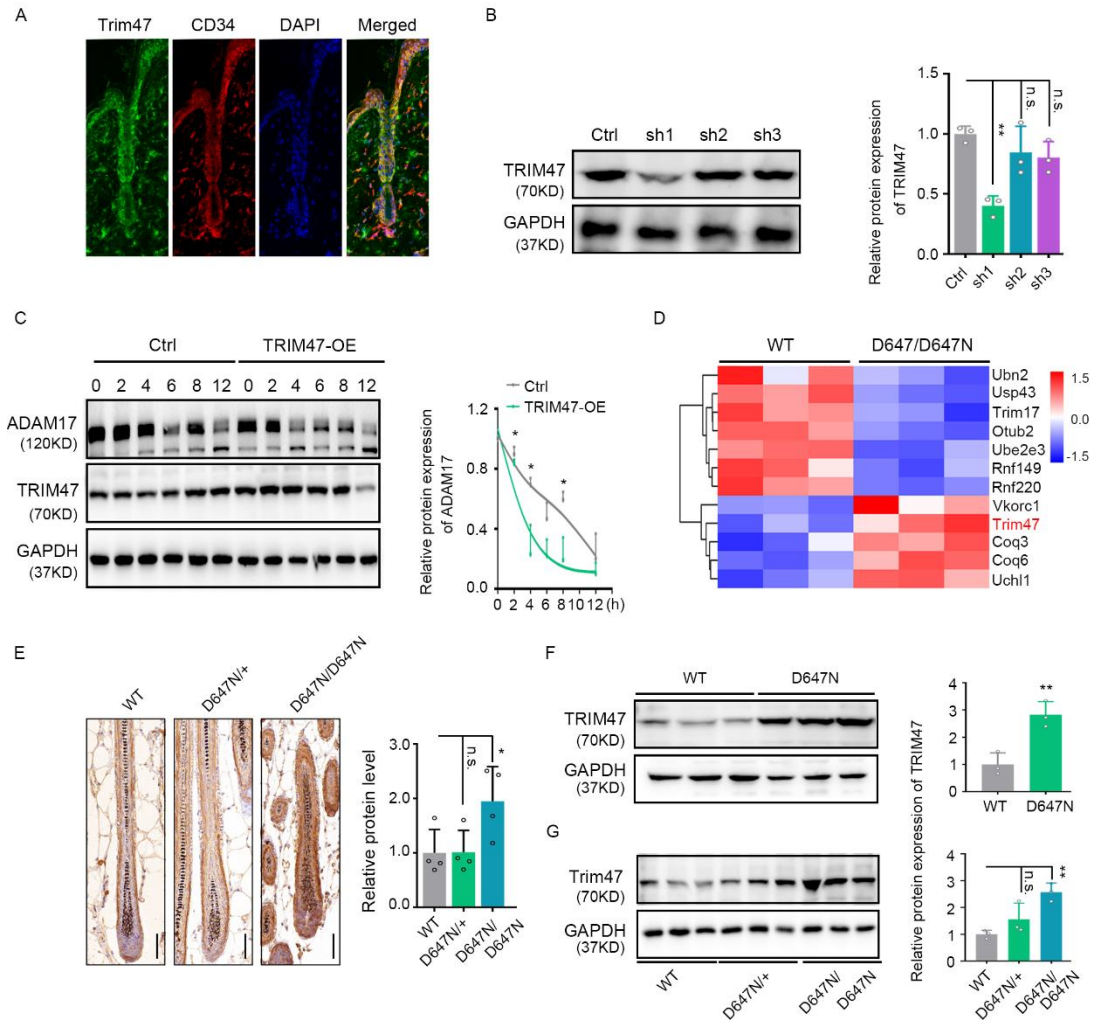

**Supporting Fig. 6 TRIM47 is identified as an ADAM17 specific E3 ubiquitin ligase.**

(A) TRIM47 showed high expression in hair follicle stem cells. Scale bars, 40  $\mu$ m. (B) The efficiency of *TRIM47*-knockdown in HaCaT cells was detected by immunoblotting. (n = 3 biological replicates). (C) Overexpression of TRIM47 promoted the proteasomal degradation of ADAM17. Left panel: Representative immunoblot images of the ADAM17 protein levels during CHX chase assays. Right panel: quantification of the

immunoblotting results corresponding to the left panel (n = 3 biological replicates). (D) Heatmap of proteins associated with ubiquinone and other terpenoid-quinone biosynthesis pathways from Proteomics-seq. (E) Immunohistochemical staining showed that *Adam17* (p.D647N) mutation led to up-regulation the expression of TRIM47 in mice. Left panel: representative images of immunohistochemical staining. Right panel: statistical results of the left panel. (n = 4 biological replicates). (F) TRIM47 protein level was significantly increased in *ADAMI7* (p.D647N) mutant HaCaT cells. Left panel: representative images of immunoblotting. Right panel: statistical results of the left panel. (n = 3 biological replicates). (G) *Adam17* (p.D647N) mutation resulted in an up-regulation of Trim47 expression in the skin of mice. Left panel: representative images of immunoblotting. Right panel: statistical results of the left panel. (n = 3 biological replicates). All experiments were repeated three times. Results were expressed as mean  $\pm$  SD, n.s., not significant; \* $P < 0.05$ ; \*\* $P < 0.01$ , Unpaired two-tailed t test (C, F); One-way ANOVA test (B, E, G).

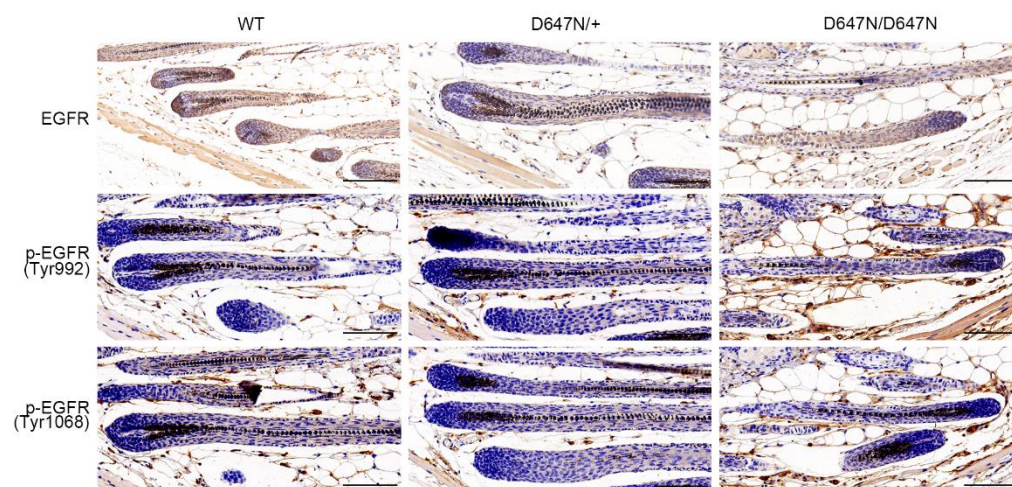

**Supporting Fig. 7 *Adam17* (p.D647N) variant does not impede EGFR signaling**

## pathway in mice.

Immunohistochemical staining revealed that *Adam17* (p.D647N) mutation does not influence the expression of epidermal growth factor receptor (EGFR), as well as phosphorylated EGFR at Tyrosine 992 (p-EGFR (Try992)) and Tyrosine 1068 (p-EGFR (Try1068)) in *Adam17*<sup>D647N/D647N</sup> mice. Scale bar, 100  $\mu$ m.

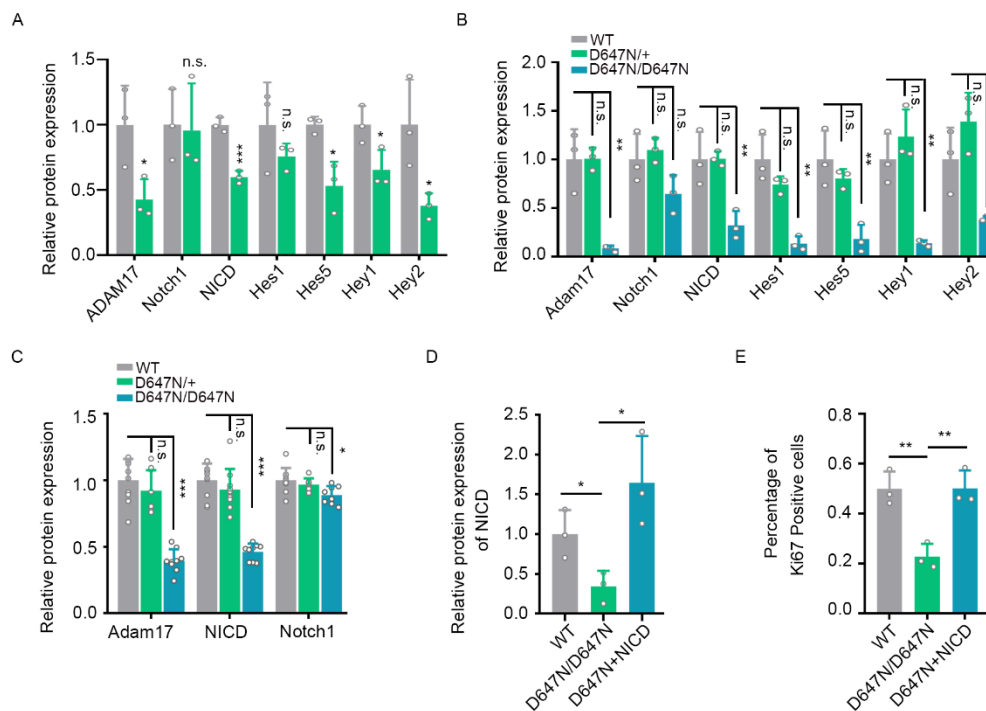

## Supporting Fig. 8 *ADAM17* (p.D647N) variant affects Notch signaling pathway.

(A) Quantification of the immunoblotting results corresponding to Figure 7A showing the effect of *ADAM17* (p.D647N) mutation on protein levels of key molecules involved in Notch signaling in the skin biopsy of the patient. (n = 3 biological replicates). (B) Quantification of the immunoblotting results corresponding to Figure 7B showing the effect of *ADAM17* (p.D647N) mutation on protein levels of key molecules involved in Notch signaling in the skin tissues of mice. (n = 3 biological replicates). (C)

Quantification of the immunohistochemical staining images corresponding to Figure 7D. (n = 8-10 biological replicates). **(D)** The immunoblotting results corresponding to Figure 7G were quantified to determine the efficiency of NICD overexpression in primary fibroblasts. (n = 3 biological replicates). **(E)** The percentage of Ki67-positive cells was quantified for Figure 7H. (n = 3 biological replicates). All experiments were repeated three times. Results were expressed as mean  $\pm$  SD, n.s., not significant; \* $P < 0.05$ ; \*\* $P < 0.01$ ; \*\*\* $P < 0.001$ ; Unpaired two-tailed t test (A, D); One-way ANOVA test (B, C, E); Kruskal-Wallis test (C).

## Supporting Tables

**Supporting Table 1. Summary of mass spectrometry (MS) analysis of ADAM17 interactors.**

| Identified proteins | PSM WT    | PSM (D647N) | PSM (D647N) / (WT) | Protein Accession | Protein Description                                                   |
|---------------------|-----------|-------------|--------------------|-------------------|-----------------------------------------------------------------------|
| <b>TRIM47</b>       | <b>28</b> | <b>139</b>  | <b>4.964285714</b> | <b>Q96LD4</b>     | <b>E3 ubiquitin-protein ligase TRIM47</b>                             |
| ALBU                | 105       | 113         | 1.076190476        | P02768            | Albumin                                                               |
| PTPRZ               | 100       | 58          | 0.58               | P23471            | Receptor-type tyrosine-protein phosphatase zeta                       |
| M4K2                | 28        | 56          | 2                  | Q12851            | Mitogen-activated protein kinase kinase kinase kinase 2               |
| NDST1               | 27        | 55          | 2.037037037        | P52848            | Bifunctional heparan sulfate N-deacetylase/N-sulfotransferase 1       |
| DIP2A               | 27        | 55          | 2.037037037        | Q14689            | Disco-interacting protein 2 homolog A                                 |
| AT10B               | 27        | 55          | 2.037037037        | O94823            | Phospholipid-transporting ATPase VB                                   |
| <b>ADAM17</b>       | <b>40</b> | <b>41</b>   | <b>1.025</b>       | <b>P78536</b>     | <b>Disintegrin and metalloproteinase domain-containing protein 17</b> |
| GRP75               | 70        | 38          | 0.542857143        | P38646            | Stress-70 protein, mitochondrial                                      |
| K2C1                | 34        | 36          | 1.058823529        | P04264            | Keratin, type II cytoskeletal 1                                       |
| KCC2D               | 8         | 36          | 4.5                | Q13557            | Calcium/calmodulin-dependent protein kinase type II                   |

|        |    |    |             |        |                                                     |
|--------|----|----|-------------|--------|-----------------------------------------------------|
|        |    |    |             |        | subunit delta                                       |
| HS71A  | 49 | 32 | 0.653061224 | P0DMV8 | Heat shock 70 kDa protein 1A                        |
| HS71B  | 49 | 32 | 0.653061224 | P0DMV9 | Heat shock 70 kDa protein 1B                        |
| KCC2G  | 6  | 30 | 5           | Q13555 | Calcium/calmodulin-dependent protein kinase type II |
|        |    |    |             |        | subunit gamma                                       |
| K1C10  | 33 | 29 | 0.878787879 | P13645 | Keratin, type I cytoskeletal 10                     |
| HSP7C8 | 43 | 25 | 0.581395349 | P11142 | Heat shock cognate 71 kDa protein                   |
| K22E   | 24 | 24 | 1           | P35908 | Keratin, type II cytoskeletal 2 epidermal           |
| GDE    | 20 | 22 | 1.1         | P35573 | Glycogen debranching enzyme                         |
| K1C9   | 26 | 17 | 0.653846154 | P35527 | Keratin, type I cytoskeletal 9                      |
| KPBB   | 16 | 17 | 1.0625      | Q93100 | Phosphorylase b kinase regulatory subunit beta      |
| GTF2I  | 16 | 16 | 1           | P78347 | General transcription factor II-I                   |
| BIP    | 26 | 15 | 0.576923077 | P11021 | Endoplasmic reticulum chaperone BiP                 |
| BTBD8  | 25 | 15 | 0.6         | Q5XKL5 | BTB/POZ domain-containing protein 8                 |
| NONO   | 13 | 15 | 1.153846154 | Q15233 | Non-POU domain-containing octamer-binding protein   |
| HSP72  | 20 | 14 | 0.7         | P54652 | Heat shock-related 70 kDa protein 2                 |
| SLK    | 12 | 12 | 1           | Q9H2G2 | STE20-like serine/threonine-protein kinase          |
| UTRN   | 12 | 12 | 1           | P46939 | Utrophin                                            |
| CYTSB  | 12 | 12 | 1           | Q5M775 | Cytospin-B                                          |
| DMD    | 12 | 12 | 1           | P11532 | Dystrophin                                          |

|       |    |    |              |        |                                                                                |
|-------|----|----|--------------|--------|--------------------------------------------------------------------------------|
| BACD3 | 12 | 12 | 1            | Q9H3F6 | BTB/POZ domain-containing adapter for CUL3-mediated RhoA degradation protein 3 |
| SFPQ  | 20 | 11 | 0.55         | P23246 | Splicing factor, proline- and glutamine-rich                                   |
| DHX29 | 1  | 11 | 11           | Q7Z478 | ATP-dependent RNA helicase DHX29                                               |
| IBTK  | 18 | 10 | 0.5555555556 | Q9P2D0 | Inhibitor of Bruton tyrosine kinase                                            |
| GSTP1 | 17 | 10 | 0.588235294  | P09211 | Glutathione S-transferase P                                                    |
| K2C4  | 14 | 10 | 0.714285714  | P19013 | Keratin, type II cytoskeletal 4                                                |
| G3P   | 9  | 10 | 1.111111111  | P04406 | Glyceraldehyde-3-phosphate dehydrogenase                                       |
| HS90B | 11 | 10 | 0.909090909  | P08238 | Heat shock protein HSP 90-beta                                                 |
| TCP4  | 7  | 10 | 1.428571429  | P53999 | Activated RNA polymerase II transcriptional coactivator p15                    |
| RL4   | 7  | 10 | 1.428571429  | P36578 | 60S ribosomal protein L4                                                       |
| AT8A1 | 4  | 10 | 2.5          | Q9Y2Q0 | Phospholipid-transporting ATPase                                               |
| CLNK  | 3  | 10 | 3.333333333  | Q7Z7G1 | Cytokine-dependent hematopoietic cell linker                                   |
| T132D | 3  | 10 | 3.333333333  | Q14C87 | Transmembrane protein 132D                                                     |
| LCP2  | 3  | 10 | 3.333333333  | Q13094 | Lymphocyte cytosolic protein 2                                                 |
| DYST  | 3  | 10 | 3.333333333  | Q03001 | Dystonin                                                                       |
| CFA69 | 3  | 10 | 3.333333333  | A5D8W1 | Cilia- and flagella-associated protein 69                                      |
| KPB2  | 17 | 9  | 0.529411765  | P46019 | Phosphorylase b kinase regulatory subunit alpha, liver isoform                 |

|       |    |   |             |        |                                                         |
|-------|----|---|-------------|--------|---------------------------------------------------------|
| WIPI3 | 12 | 9 | 0.75        | Q5MNZ6 | WD repeat domain phosphoinositide-interacting protein 3 |
| CPVL  | 12 | 9 | 0.75        | Q9H3G5 | Probable serine carboxypeptidase CPVL                   |
| NUCL  | 11 | 9 | 0.818181818 | P19338 | Nucleolin                                               |
| RO52  | 10 | 9 | 0.9         | P19474 | E3 ubiquitin-protein ligase TRIM21                      |
| RL6   | 7  | 9 | 1.285714286 | Q02878 | 60S ribosomal protein L6                                |
| ADT2  | 7  | 9 | 1.285714286 | P05141 | ADP/ATP translocase 2                                   |
| PIMT  | 9  | 8 | 0.888888889 | P22061 | Protein-L-isoaspartate(D-aspartate) O-methyltransferase |
| K1C14 | 8  | 8 | 1           | P02533 | Keratin, type I cytoskeletal 14                         |
| DCTN5 | 15 | 4 | 0.266666667 | Q9BTE1 | Dynactin subunit 5                                      |
| SEPT7 | 14 | 4 | 0.285714286 | Q16181 | Septin-7                                                |
| GRN   | 11 | 4 | 0.363636364 | P28799 | Progranulin                                             |
| PRDX1 | 9  | 4 | 0.444444444 | Q06830 | Peroxiredoxin-1                                         |
| ATPA  | 7  | 4 | 0.571428571 | P25705 | ATP synthase subunit alpha, mitochondrial               |
| NPM   | 7  | 4 | 0.571428571 | P06748 | Nucleophosmin                                           |
| PHB1  | 7  | 4 | 0.571428571 | P35232 | Prohibitin 1                                            |
| DCTN5 | 15 | 4 | 0.266666667 | Q9BTE1 | Dynactin subunit 5                                      |

---

**Abbreviations:** PSM, peptide spectrum match.

**Supporting Table 2. Classification of non-syndromic congenital hypotrichosis.**

| Name                   | OMIM   | Inheritance | Gene          | Locus    | Phenotype                                                                                                                                                      | Reference |
|------------------------|--------|-------------|---------------|----------|----------------------------------------------------------------------------------------------------------------------------------------------------------------|-----------|
| HYPT1 (HHS1)           | 605389 | AD          | <i>APCDD1</i> | 18p11.22 | Sparse, short and thin hair on scalp and body.<br>Eyebrows, eyelashes and beard hair are normal                                                                | (1)       |
| HYPT2 (HHS2)           | 146520 | AD          | <i>CDSN</i>   | 6p21.33  | Normal hair at birth, sparse hair on scalp and body,<br>scalp hair growth retardation with diffuse hair loss.<br>Eyebrows, eyelashes and beard hair are normal | (2)       |
| HYPT3 (ADWH1)          | 613981 | AD          | <i>KRT74</i>  | 12q13.13 | Sparse scalp hair with wooly hair. Eyebrows,<br>eyelashes, and beard hair are normal                                                                           | (3)       |
| HYPT4 (MUHH1)          | 146550 | AD          | <i>U2HR</i>   | 8p21.3   | Sparse and fragile hair with hair growth retardation                                                                                                           | (4)       |
| HYPT5 (MUHH2)          | 612841 | AD          | <i>EPS8L3</i> | 1p13.3   | Sparse to absent scalp hair at birth. Irregular hair in<br>childhood. Thin eyebrows and eyelashes                                                              | (5)       |
| HYPT6 (LAH1)           | 697903 | AR          | <i>DSG4</i>   | 18q12.1  | Localized sparse scalp hairs, absence of eyebrows<br>and eyelashes. axillary and pubic hairs, follicular<br>papules on scalp are normal                        | (6)       |
| HYPT7 (ARWH2,<br>LAH2) | 604379 | AR          | <i>LIPH</i>   | 3q27.2   | Localized sparse, thin, fragile and short scalp hair<br>with wooly, slightly colored hair. Normal sparse<br>eyebrows, eyelashes, axillary and body hair        | (7)       |

|                     |        |    |                |                |                                                                                                                      |      |
|---------------------|--------|----|----------------|----------------|----------------------------------------------------------------------------------------------------------------------|------|
| HYPT8 (ARWH1, LAH3) | 278150 | AR | <i>LPAR6</i>   | 13q14.2        | Slow growing hair with woolly hair, normal to sparse eyebrows and eyelashes, popular lesions on the occipital region | (8)  |
| HYPT9 (LAH4)        | 614237 | AR | unknown        | 10q11.23-q22.3 | Localized sparse and slightly brown hair on scalp, arms and legs. Normal eyebrows and eyelashes                      | (9)  |
| HYPT10 (LAH5)       | 614238 | AR | unknown        | 7q22.3-21.3    | Absent hair at birth. Sparse scalp, eyebrows, eyelashes and body hairs with papules on scalp                         | (10) |
| HYPT11 (HHS3)       | 615059 | AD | <i>SNRPE</i>   | 1q32.1         | Sparse to absent scalp, body hair and eyebrows, normal pubic hair                                                    | (11) |
| HYPT12 (HHS4)       | 615885 | AD | <i>RPL21</i>   | 13q12.2        | Hair loss began at 2–6 months, absent to sparse scalp hair, eyebrows, eyelashes, body hair, axillary and pubic hairs | (12) |
| HYPT13 (ADWH2)      | 615896 | AD | <i>KRT71</i>   | 12q13.13       | Short sparse hair with woolly hair. Sparse eyebrows and eyelashes                                                    | (13) |
| HYPT14 (HHS5)       | 618275 | AR | <i>LSS</i>     | 21q22.3        | Scalp hair loss and partial loss of the eyebrows and eyelashes with paucity of body hair                             | (14) |
| ARWH3               | 616760 | AR | <i>KRT25</i>   | 17q21.2        | Soft, short and sparse hairs on the scalp. Normal eyebrows, but sparse eyelashes                                     | (15) |
| –                   | –      | AD | <i>KRT25</i>   | 17q21.2        | Sparse, soft, and curled scalp hairs                                                                                 | (16) |
| –                   | –      | AR | <i>C3ORF52</i> | 3q13.2         | Sparse scalp, eyebrows, and eyelashes                                                                                | (17) |

**ADWH3** – **AD** *ADAM17* **2p25.1** **Sparse scalp, eyebrows and eyelashes with woolly hair** **Our study**

---

**Abbreviations:** HYPT, hypotrichosis; AD, autosomal dominant; AR, autosomal recessive; HHS, hereditary hypotrichosis simplex; MUHH, Marie Unna hereditary hypotrichosis; LAH, localized autosomal recessive hypotrichosis; ARWH, autosomal recessive woolly hair/hypotrichosis; OMIM, Online Mendelian Inheritance in Man.

**Supporting Table 3. Primers used for PCR.**

| Primer name         | Primer sequence 5'-3'                                       |
|---------------------|-------------------------------------------------------------|
| Genotyping Primer F | GGATGTATTGTGACAGTGCTAGTG                                    |
| Genotyping Primer R | GAAACAAATGCTGGAGTCCCTGAA                                    |
| Sequencing Primer   | GGATGTATTGTGACAGTGCTAGTG                                    |
| Trim47 sh1 Primer F | CCGGGCCGTAGACAACACGTGTGTACTCGAGTACCACACGTGTTGTCTACGGCTTTTTG |
| Trim47 sh1 Primer R | AATTCAAAAATAGACAACACGTGTGTACTCGAGTACACACGTGTTGTCTACGGC      |
| Trim47 sh2 Primer F | CCGGGCCAGCAAGTGTGACAGTCATCTCGAGATGACTGTCACACTTGCTGGCTTTTTG  |
| Trim47 sh2 Primer R | AATTCAAAAAGCCAGCAAGTGTGACAGTCATCTCGAGATGACTGTCACACTTGCTGGC  |
| Trim47 sh3 Primer F | CCGGGCCACCTTTACTCTGCTCTATCTTCGAGATAGAGCAGAGTAAAGGTGGCTTTTTG |
| Trim47 sh3 Primer R | AATTCAAAAAGCCACCTTTACTCTGCTCTATCTTCGAGATAGAGCAGAGTAAAGGTGGC |
| ADAM17 human F      | GTGGATGGTAAAAACGAAAGCG                                      |

---

|                 |                         |
|-----------------|-------------------------|
| ADAM17 human R  | GGCTAGAACCCTAGAGTCAGG   |
| β-actin human F | CATGTACGTTGCTATCCAGGC   |
| β-actin human R | CTCCTTAATGTCACGCACGAT   |
| ADAM17 mouse F  | ACCACTTTGGTGCCTTTCGT    |
| ADAM17 mouse R  | GTCGCAGACTGTAGATCCCTT   |
| Notch1 mouse F  | GATGGCCTCAATGGGTACAAG   |
| Notch1 mouse R  | TCGTTGTTGTTGATGTCACAGT  |
| Notch2 mouse F  | GAGAAAAACCGCTGTCAGAATGG |
| Notch2 mouse R  | GGTGGAGTATTGGCAGTCCTC   |
| Notch3 mouse F  | AGTGCCGATCTGGTACA ACTT  |
| Notch3 mouse R  | CACTACGGGGTTCTCACACA    |
| Notch4 mouse F  | CTCTTGCCACTCAATTTCCCT   |
| Notch4 mouse R  | TTGCAGAGTTGGGTATCCCTG   |
| Hey1 mouse F    | CCGACGAGACCGAATCAATAAC  |
| Hey1 mouse R    | TCAGGTGATCCACAGTCATCTG  |
| Hey2 mouse F    | CGCCCTTGTGAGGAAACGA     |
| Hey2 mouse R    | CCCAGGGTAATTGTTCTCGCT   |
| Hes1 mouse F    | TCAACACGACACCGGACAAAC   |
| Hes1 mouse R    | ATGCCGGGAGCTATCTTTCTT   |
| Hes5 mouse F    | AGTCCCAAGGAGAAAAACCGA   |

---

|                        |                        |
|------------------------|------------------------|
| Hes5 mouse R           | GCTGTGTTTCAGGTAGCTGAC  |
| Ptcra mouse F          | CGTCAGGTGTCAGGCTCTAC   |
| Ptcra mouse R          | GTGAAGGCGTCTAGGGCAC    |
| $\beta$ -actin mouse F | GGCTGTATTCCCCTCCATCG   |
| $\beta$ -actin mouse R | CCAGTTGGTAACAATGCCATGT |

**Supporting Table 4. Antibodies and dilutions used in this study.**

| Antibody | Dilutions for |       |    |       |      | Company                   | Catalogue No. |
|----------|---------------|-------|----|-------|------|---------------------------|---------------|
|          | WB            | IF    | IP | IHC   | FACS |                           |               |
| ADAM17   | 1:1000        | 1:100 | /  | 1:100 | /    | Abcam                     | AB39163       |
| ADAM17   | 1:1000        | /     | /  | /     | /    | Abclonal                  | A0821         |
| TRIM47   | 1:2000        | 1:100 | /  | 1:100 | /    | Abclonal                  | A17803        |
| His-Tag  | 1:2000        | /     | /  | /     | /    | Cell Signaling Technology | 12698P        |
| Gata3    | 1:2000        | 1:500 | /  | /     | /    | Cell Signaling Technology | 5852T         |
| AE13     | 1:2000        | 1:200 | /  | /     | /    | Abcam                     | ab16113       |
| K5       | 1:2000        | 1:500 | /  | /     | /    | Abcam                     | Ab52635       |

|                                     |        |       |       |       |        |                           |            |
|-------------------------------------|--------|-------|-------|-------|--------|---------------------------|------------|
| Krt74                               | 1:1000 | /     | /     | /     | /      | Thermo fisher scientific  | PA5-45864  |
| Krt6a                               | 1:1000 | /     | /     | /     | /      | Proteintech               | 17391-1-AP |
| CD200                               | /      | 1:50  | /     | /     | /      | Abclonal                  | A21226     |
| HA-Tag (C29F4)                      | 1:2000 | 1:200 | 1:100 | /     | /      | Cell Signaling Technology | 3724S      |
| Notch1                              | 1:1000 | /     | /     | 1:200 | /      | Cell Signaling Technology | 3608S      |
| Cleaved Notch1                      | 1:1000 | 1:200 | /     | 1:200 | /      | Cell Signaling Technology | 4147S      |
| Hey1                                | 1:1000 | /     | /     | /     | /      | Abclonal                  | A16110     |
| Hey2                                | 1:1000 | /     | /     | /     | /      | Abclonal                  | A15143     |
| Hes1                                | 1:1000 | /     | /     | /     | /      | Abclonal                  | A16110     |
| Hes5                                | 1:1000 | /     | /     | /     | /      | Abcam                     | ab194111   |
| Ki67                                | /      | 1:300 | /     | /     | /      | Cell Signaling Technology | 9449T      |
| Ubiquitin                           | 1:2000 |       |       |       |        | Santa cruz                | sc-8017    |
| Fixable Viability Dye eFluor 455UV  | /      | /     | /     | /     | 1:1000 | Ebioscience               | 65-0868-14 |
| CD34 Monoclonal Antibody eFluor 660 | /      | /     | /     | /     | 1:150  | ebioscience               | 50-0341-82 |
| Ki-67 Monoclonal Antibody FITC      | /      | /     | /     | /     | 1:100  | ebioscience               | 11-5698-80 |

|                                                  |        |       |   |        |       |                           |             |
|--------------------------------------------------|--------|-------|---|--------|-------|---------------------------|-------------|
| CD49f (Integrin alpha 6) Monoclonal Antibody, PE | /      | /     | / | /      | 1:100 | ebioscience               | 12-0495-83  |
| LaminB                                           | 1:1000 | /     | / | /      | /     | Cell Signaling Technology | 17416T      |
| GAPDH                                            | 1:2000 | /     | / | /      | /     | Yeasen                    | 30203ES50   |
| α-tubulin                                        | 1:2000 | /     | / | /      | /     | Yeason                    |             |
| CD34                                             | /      | 1:100 | / | /      | /     | Abcam                     | 30303ES50   |
| K15                                              | /      | 1:200 | / | /      | /     | Proteintech               | 10137-1-AP  |
| HRP-linked Goat Anti Rabbit IgG                  | 1:5000 | /     | / | /      | /     | Jackson ImmunoResearch    | 115-035-003 |
| HRP-linked Goat Anti Mouse IgG                   | 1:5000 | /     | / | /      | /     | Jackson ImmunoResearch    | 111-545-003 |
| Alexa Fluor® 488 Goat Anti Rabbit IgG            | /      | 1:200 | / | /      | /     | Jackson ImmunoResearch    | 115-605-003 |
| Alexa Fluor® 647 Goat Anti Mouse IgG             | /      | 1:200 | / | /      | /     | Jackson ImmunoResearch    | A12380      |
| EGFR                                             | /      | /     | / | 1:200  | /     | Proteintech               | 66455-1-Ig  |
| p-EGFR(Trp992)                                   | /      | /     | / | 1: 200 | /     | Cell Signaling Technology | 2235T       |
| p-EGFR(Trp1068)                                  | /      | /     | / | 1:400  | /     | Cell Signaling Technology | 3777T       |

---

**Abbreviations:** WB, western-blot; IF, Immunofluorescence; IP, Immunoprecipitation; IHC, Immunohistochemistry; FACS, Flow Cytometry.

## References:

1. Shimomura Y, Agalliu D, Vonica A, Luria V, Wajid M, Baumer A, et al. APCDD1 is a novel Wnt inhibitor mutated in hereditary hypotrichosis simplex. *Nature*. 2010;464(7291):1043-7.
2. Levy-Nissenbaum E, Betz RC, Frydman M, Simon M, Lahat H, Bakhan T, et al. Hypotrichosis simplex of the scalp is associated with nonsense mutations in CDSN encoding corneodesmosin. *Nature genetics*. 2003;34(2):151-3.
3. Shimomura Y, Wajid M, Petukhova L, Kurban M, and Christiano AM. Autosomal-dominant woolly hair resulting from disruption of keratin 74 (KRT74), a potential determinant of human hair texture. *American journal of human genetics*. 2010;86(4):632-8.
4. Wen Y, Liu Y, Xu Y, Zhao Y, Hua R, Wang K, et al. Loss-of-function mutations of an inhibitory upstream ORF in the human hairless transcript cause Marie Unna hereditary hypotrichosis. *Nature genetics*. 2009;41(2):228-33.
5. Zhang X, Guo BR, Cai LQ, Jiang T, Sun LD, Cui Y, et al. Exome sequencing identified a missense mutation of EPS8L3 in Marie Unna hereditary hypotrichosis. *Journal of medical genetics*. 2012;49(12):727-30.
6. Kljuic A, Bazzi H, Sundberg JP, Martinez-Mir A, O'Shaughnessy R, Mahoney MG, et al. Desmoglein 4 in hair follicle differentiation and epidermal adhesion: evidence from inherited hypotrichosis and acquired pemphigus vulgaris. *Cell*. 2003;113(2):249-60.
7. Shimomura Y, Wajid M, Petukhova L, Shapiro L, and Christiano AM. Mutations in the lipase H gene underlie autosomal recessive woolly hair/hypotrichosis. *The Journal of investigative dermatology*. 2009;129(3):622-8.
8. Nahum S, Morice-Picard F, Taieb A, and Sprecher E. A novel mutation in LPAR6 causes autosomal recessive hypotrichosis of the scalp. *Clinical and experimental dermatology*. 2011;36(2):188-94.
9. Naz G, Ali G, Naqvi SK, Azeem Z, and Ahmad W. Mapping of a novel autosomal recessive hypotrichosis locus on chromosome 10q11.23–22.3. *Human genetics*. 2010;127(4):395-401.
10. Basit S, Ali G, Wasif N, Ansar M, and Ahmad W. Genetic mapping of a novel hypotrichosis locus to chromosome 7p21.3-p22.3 in a Pakistani family and screening of the candidate genes. *Human genetics*. 2010;128(2):213-20.
11. Pasternack SM, Refke M, Paknia E, Hennies HC, Franz T, Schäfer N, et al. Mutations in SNRPE, which encodes a core protein of the spliceosome, cause autosomal-dominant hypotrichosis simplex. *American journal of human genetics*. 2013;92(1):81-7.
12. Zhou C, Zang D, Jin Y, Wu H, Liu Z, Du J, et al. Mutation in ribosomal protein L21 underlies hereditary hypotrichosis simplex. *Human mutation*. 2011;32(7):710-4.
13. Fujimoto A, Farooq M, Fujikawa H, Inoue A, Ohyama M, Ehama R, et al. A missense mutation within the helix initiation motif of the keratin K71 gene

- underlies autosomal dominant woolly hair/hypotrichosis. *The Journal of investigative dermatology*. 2012;132(10):2342-9.
14. Romano MT, Tafazzoli A, Mattern M, Sivalingam S, Wolf S, Rupp A, et al. Bi-allelic Mutations in LSS, Encoding Lanosterol Synthase, Cause Autosomal-Recessive Hypotrichosis Simplex. *American journal of human genetics*. 2018;103(5):777-85.
  15. Akiyama M. Isolated autosomal recessive woolly hair/hypotrichosis: genetics, pathogenesis and therapies. *Journal of the European Academy of Dermatology and Venereology : JEADV*. 2021;35(9):1788-96.
  16. Yu X, Chen F, Ni C, Zhang G, Zheng L, Zhang J, et al. A Missense Mutation within the Helix Termination Motif of KRT25 Causes Autosomal Dominant Woolly Hair/Hypotrichosis. *The Journal of investigative dermatology*. 2018;138(1):230-3.
  17. Malki L, Sarig O, Cesarato N, Mohamad J, Canter T, Assaf S, et al. Loss-of-function variants in C3ORF52 result in localized autosomal recessive hypotrichosis. *Genetics in medicine : official journal of the American College of Medical Genetics*. 2020;22(7):1227-34.
