# Supplementary material for: ADAM17 variant causes hair loss via ubiquitin ligase TRIM47–mediated degradation
Source: JCI journal article supplement (doi:10.1172/jci.insight.177588), 2024-05-21
Supplement: sd2 [file 2]

You are being redirected.
