# Supplementary material for: ADAM17 variant causes hair loss via ubiquitin ligase TRIM47–mediated degradation
Source: JCI journal article supplement (doi:10.1172/jci.insight.177588), 2024-05-21
Supplement: sd2 [file 2]

**Full unedited gel for Figure2G**

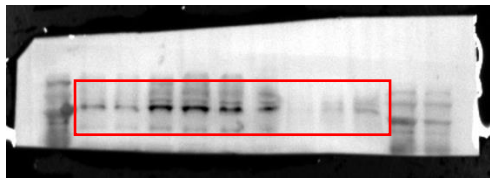

ADAM17

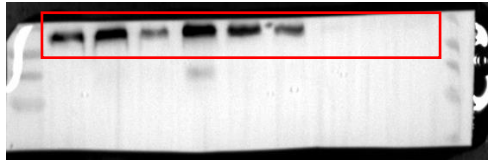

AE13

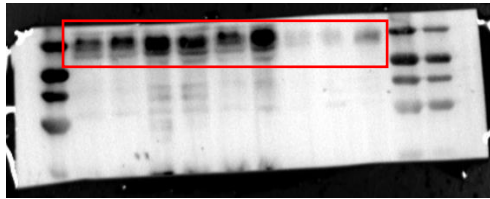

Gata3

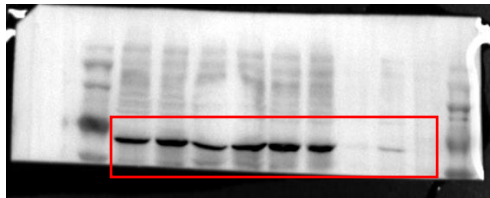

KRT74

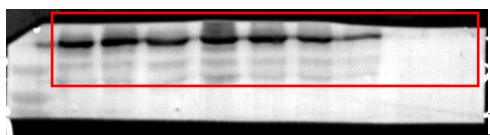

KTR5

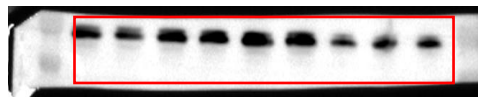

KTR6B

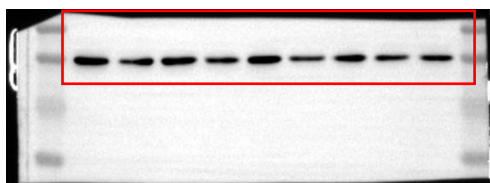

GAPDH

**Full unedited gel for Figure 4B**

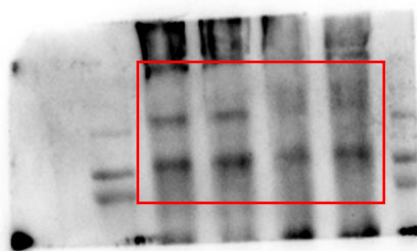

ADAM17

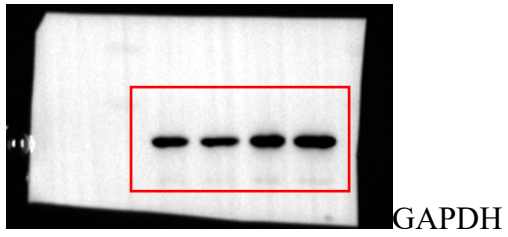

**Full unedited gel for Figure 4E**

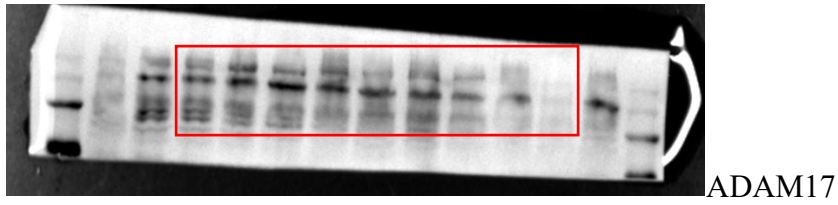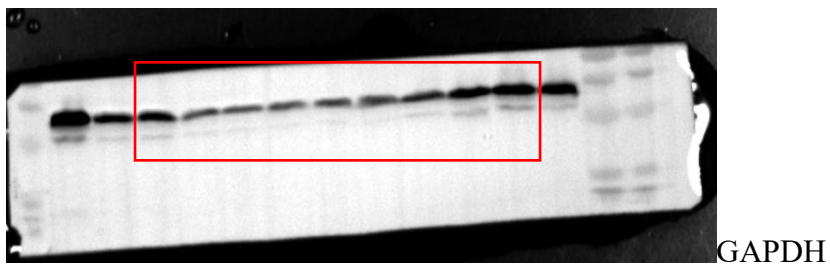

**Full unedited gel for Figure 4G**

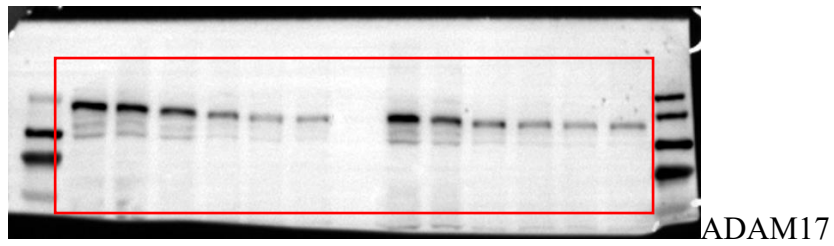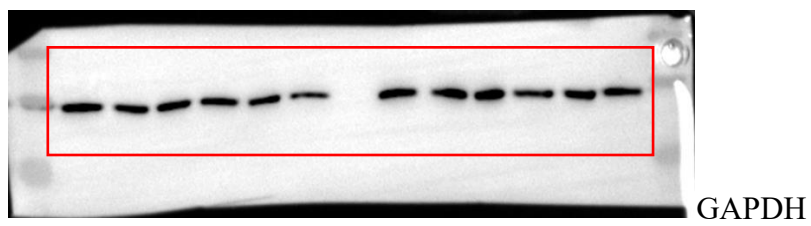

**Full unedited gel for Figure 4H**

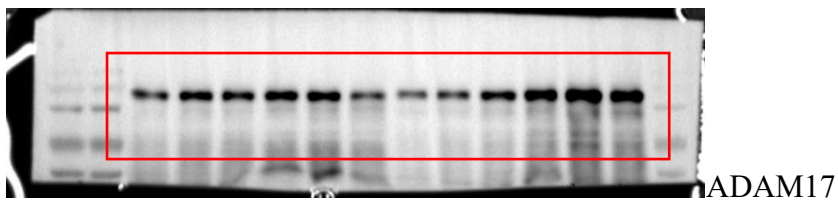

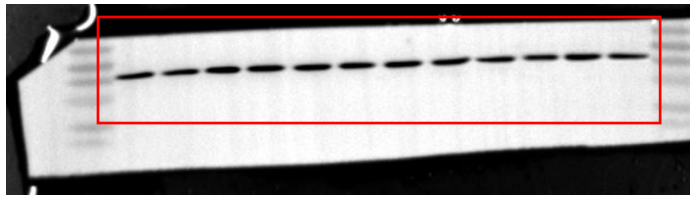

GAPDH

Full unedited gel for Figure 4I

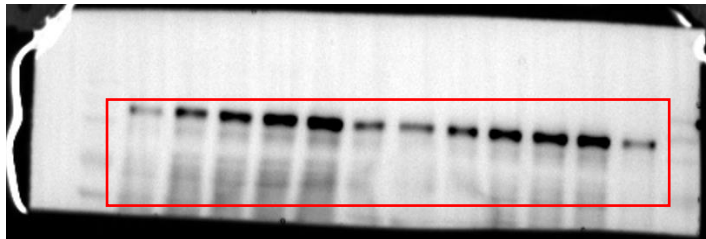

ADAM17

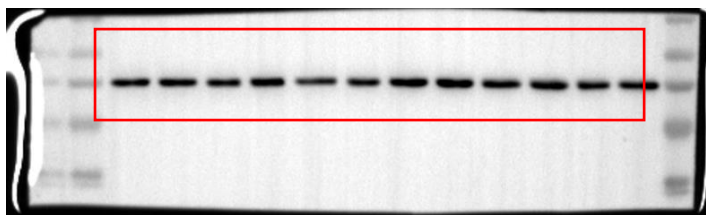

GAPDH

Full unedited gel for Figure 4J

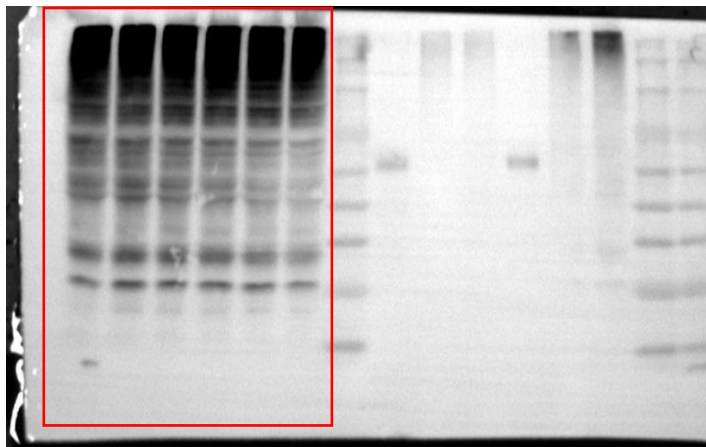

UBQ left panel

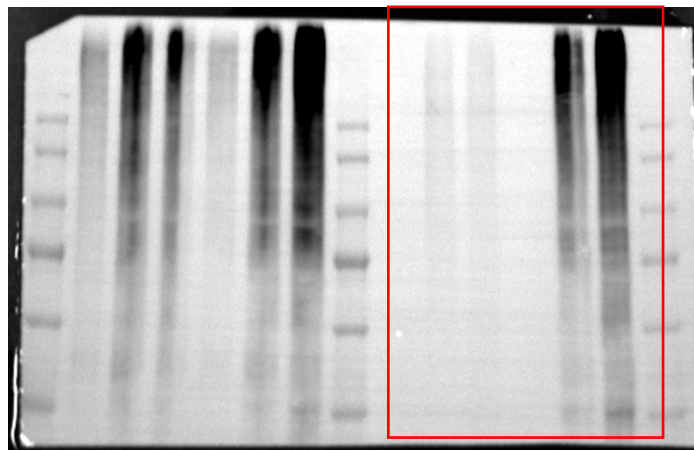

UBQ Right panel

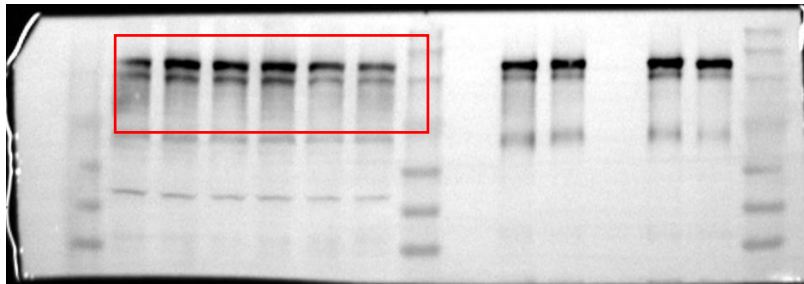

HA left panel

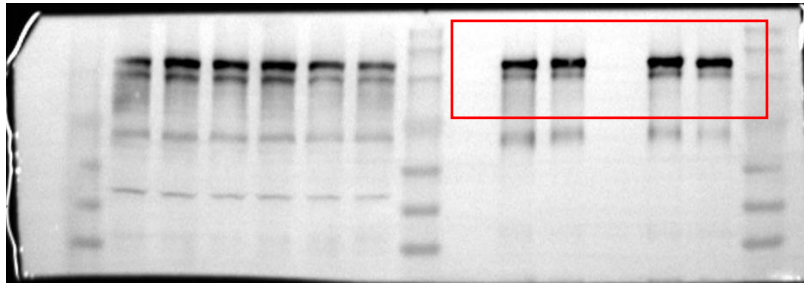

HA Right panel

**Full unedited gel for Figure 5C**

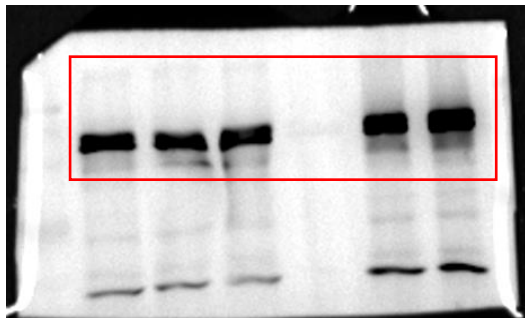

HA tagged ADAM17

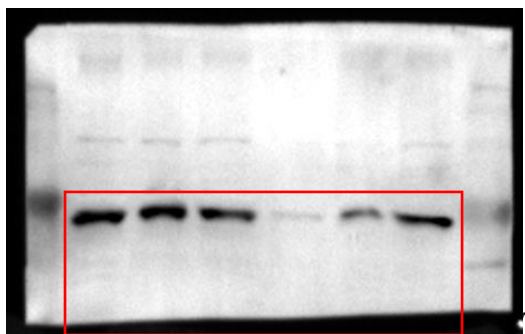

TRIM47

**Full unedited gel for Figure 5D**

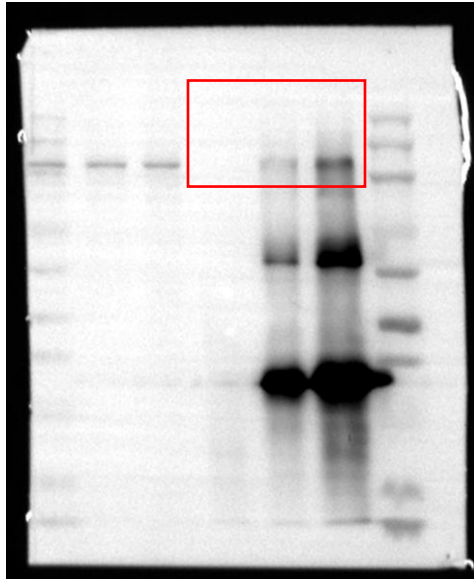

HA-tagged ADAM17

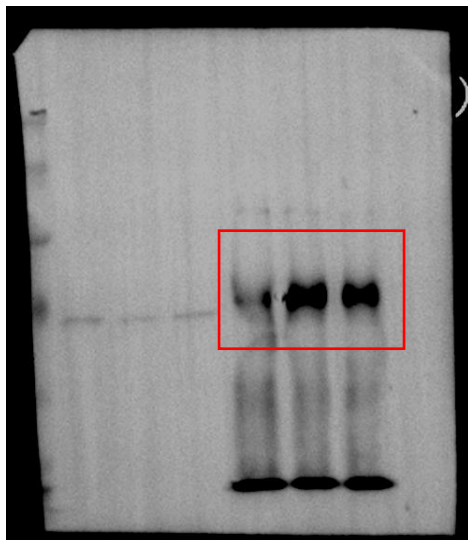

His-tagged TRIM47

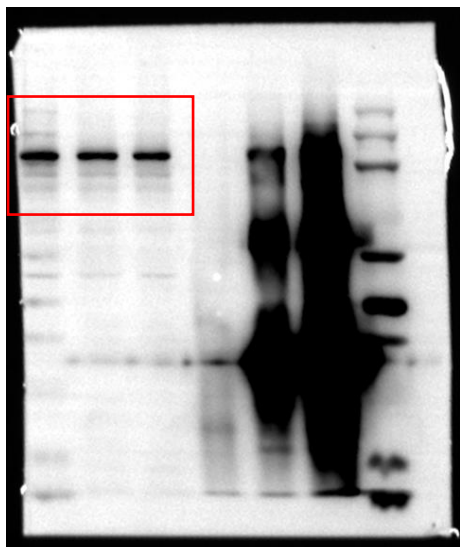

HA-Tagged ADAM17

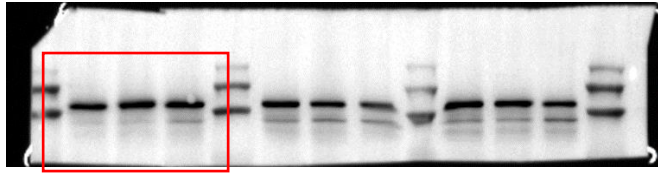

His-tagged TRIM47

**Full unedited gel for Figure 5D**

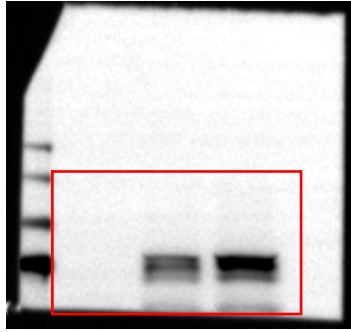

TRIM47

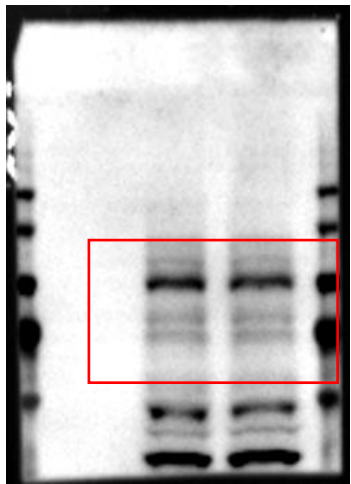

ADAM17

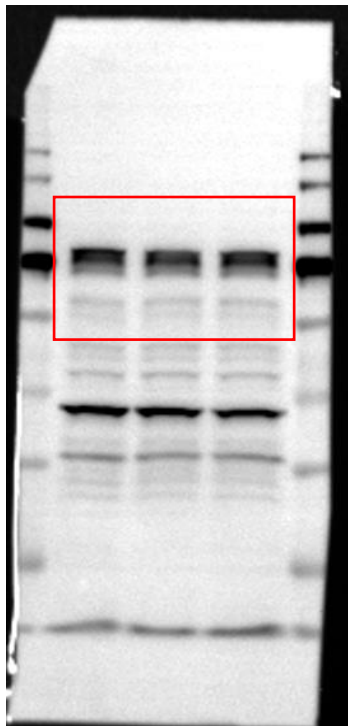

TRIM47

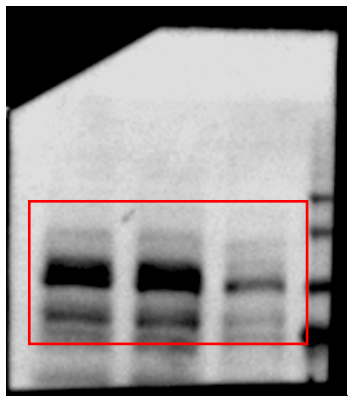

ADAM17

**Full unedited gel for Figure 5I**

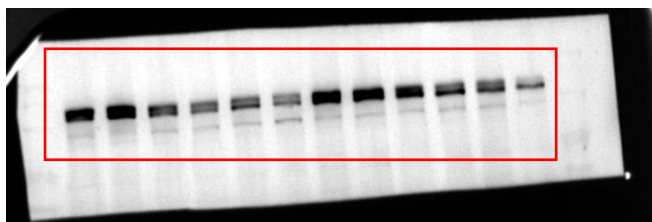

ADAM17

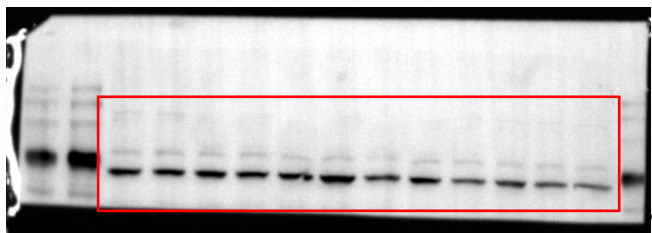

TRIM47

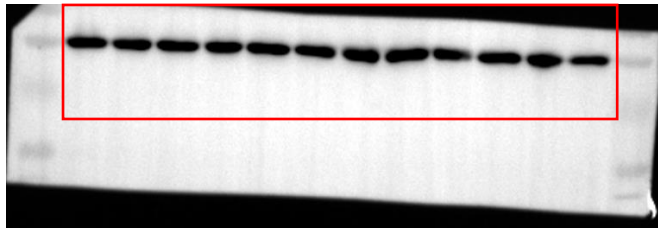

GAPDH

Full unedited gel for Figure 7A

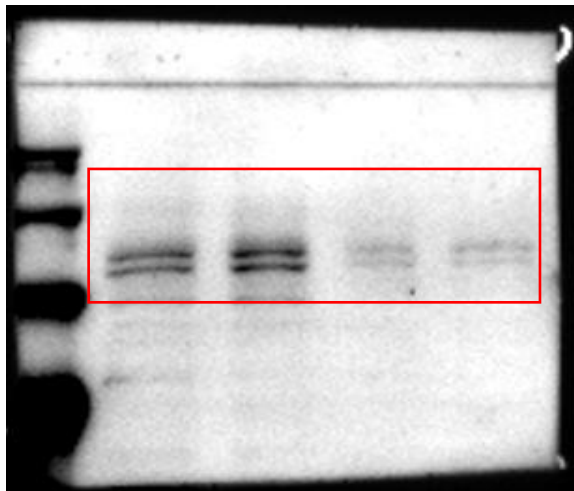

ADAM17

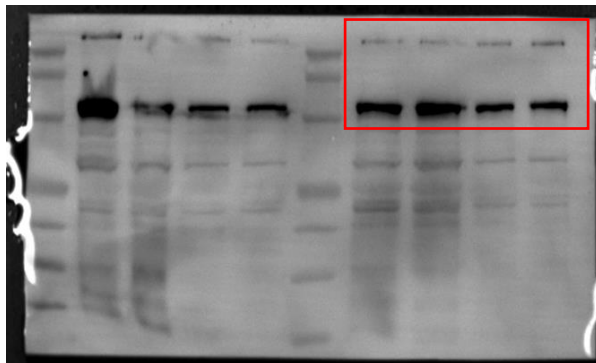

Notch1

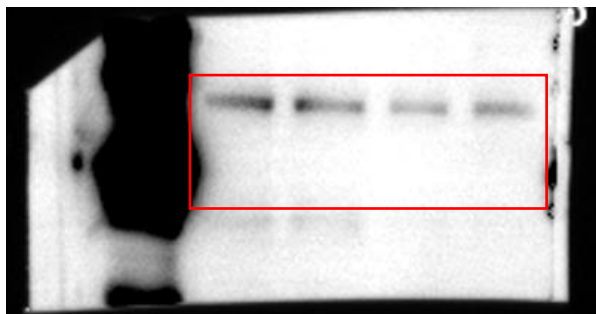

Hes1



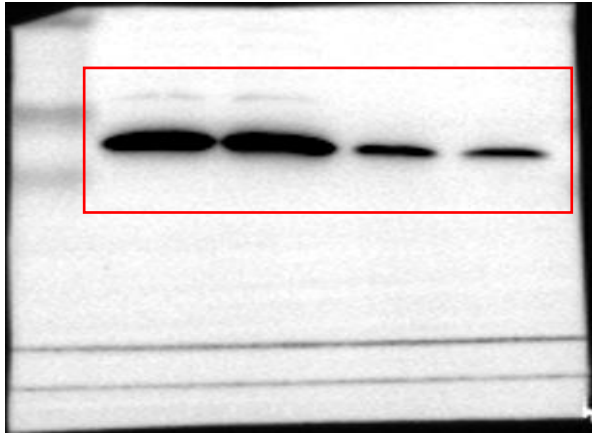

Hes5

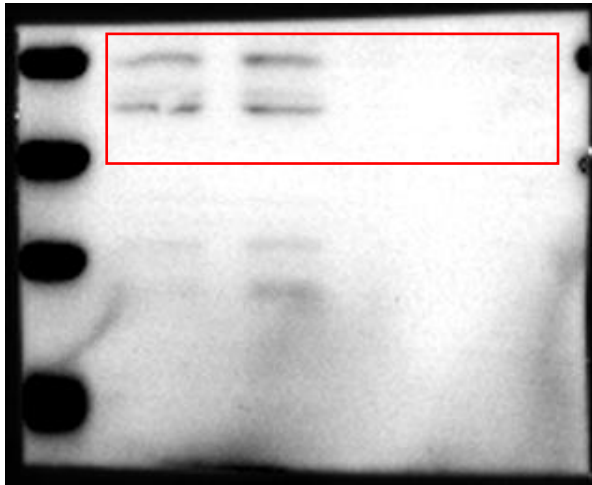

Hey1

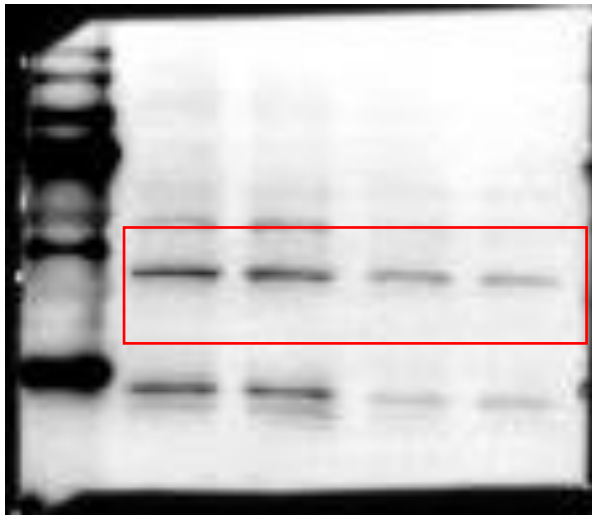

Hey2

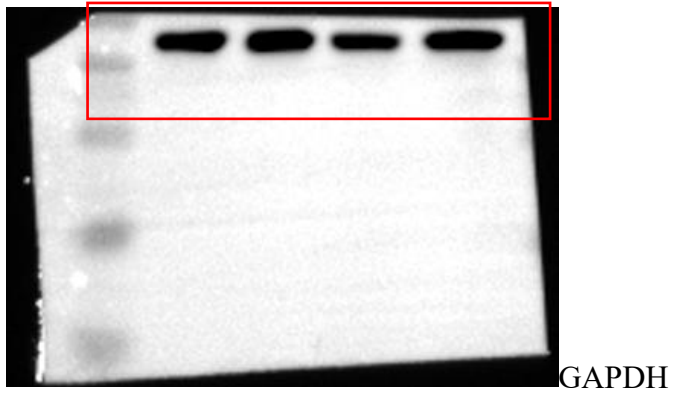

Full unedited gel for Figure 7B

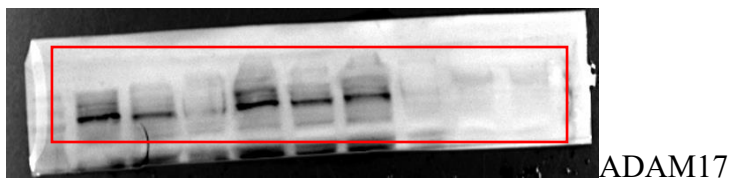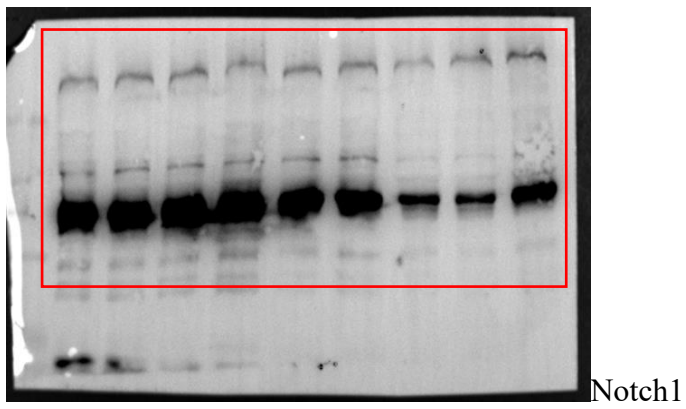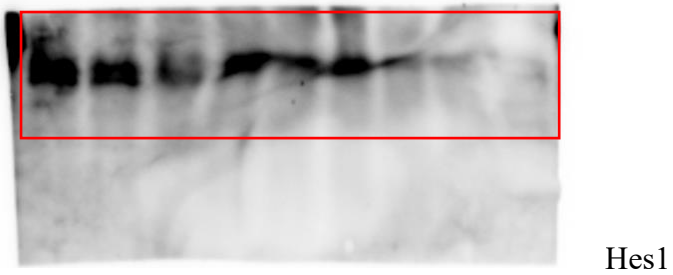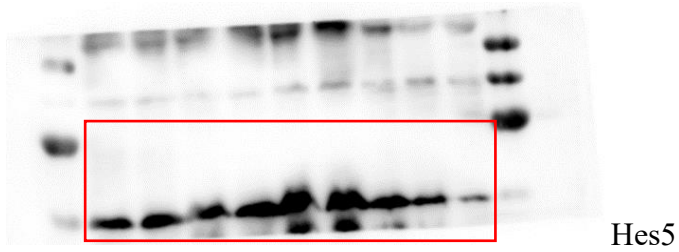

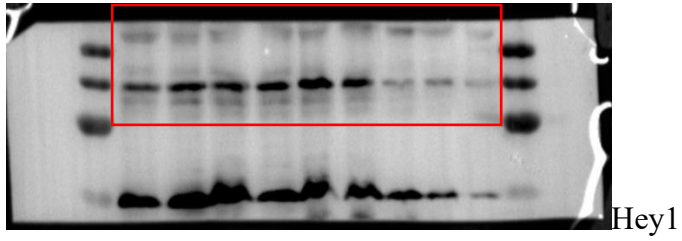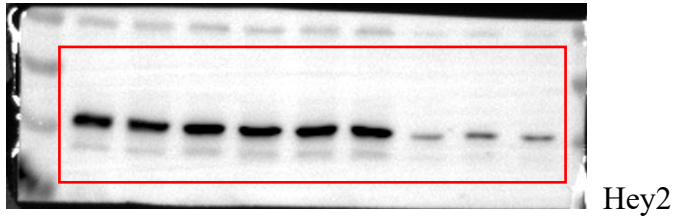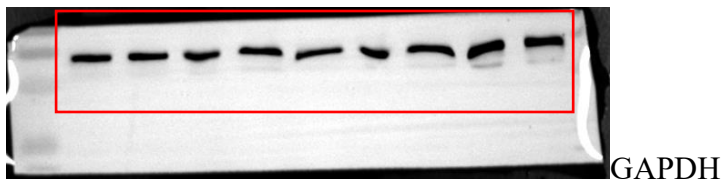

Full unedited gel for Figure 7F

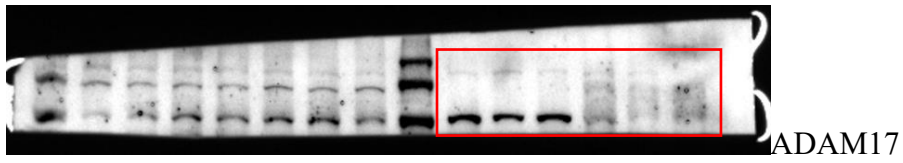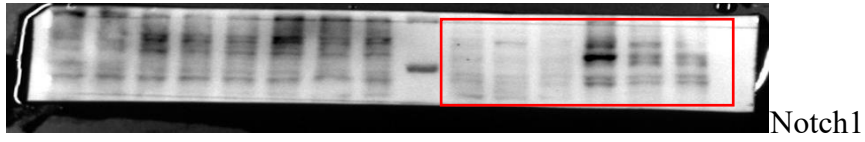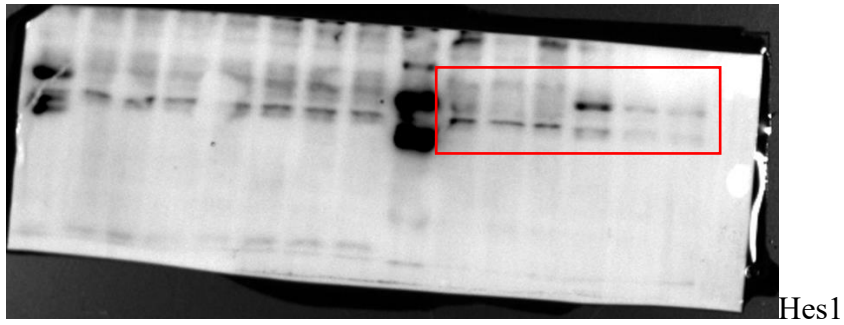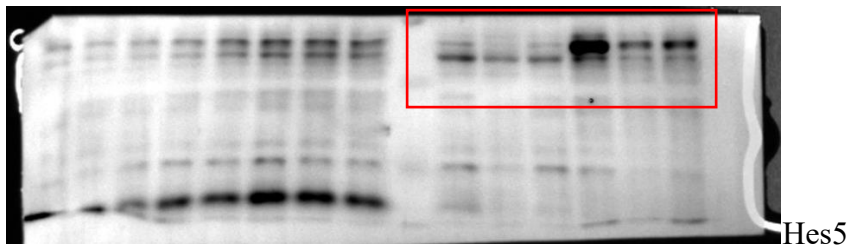

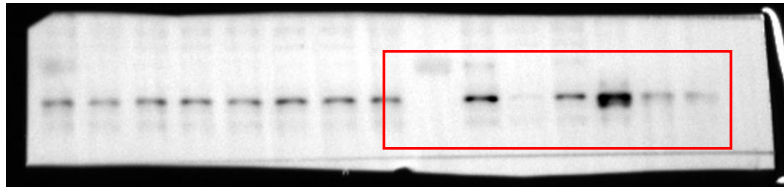

Hey1

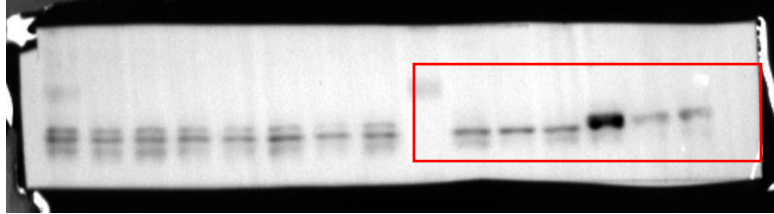

Hey2

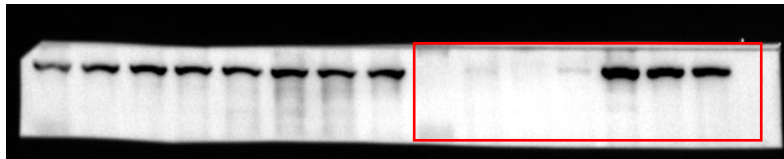

Lamin B

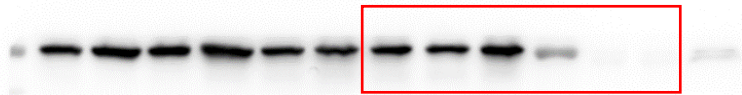

Tubulin

**Full unedited gel for Figure 7G**

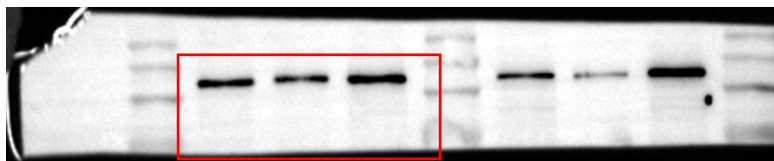

Notch

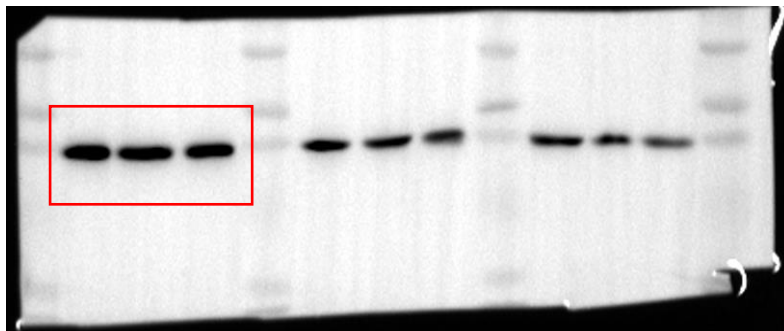

GAPDH

**Full unedited gel for Figure S4B**

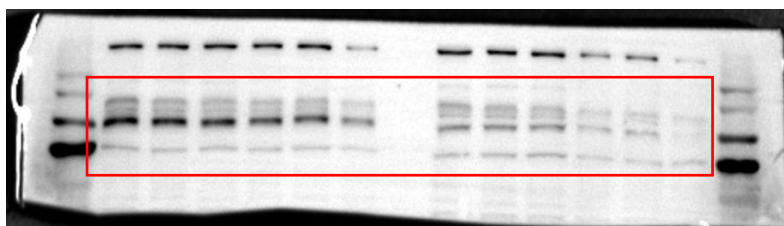

ADAM17

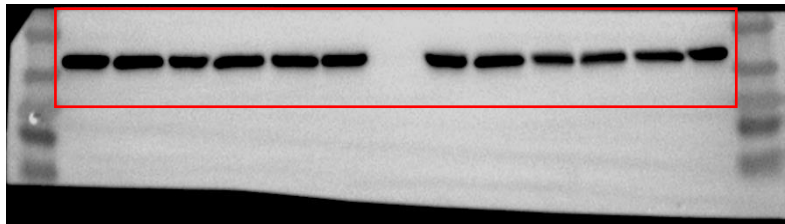

GAPDH

**Full unedited gel for Figure S4D**

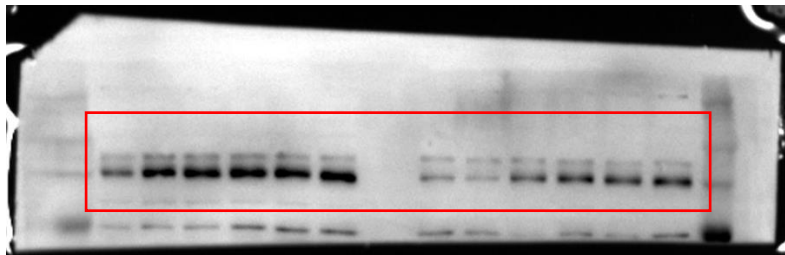

ADAM17

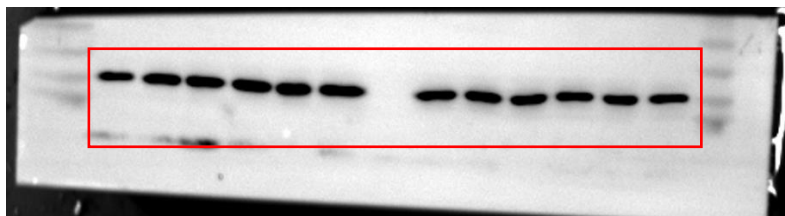

GAPDH

**Full unedited gel for Figure S4E**

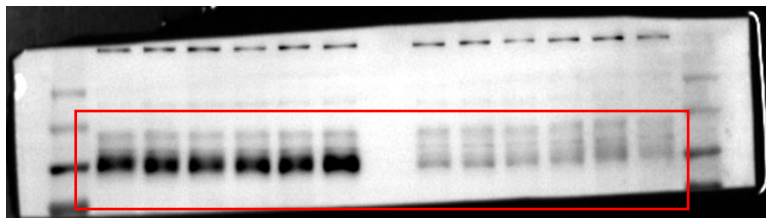

ADAM17

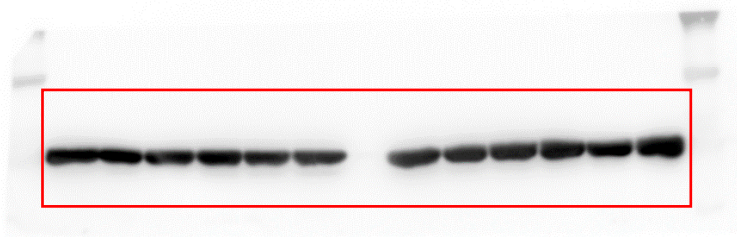

GAPDH

**Full unedited gel for Figure S6B**

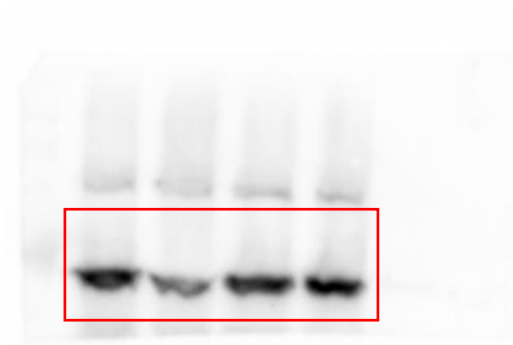

TRIM47

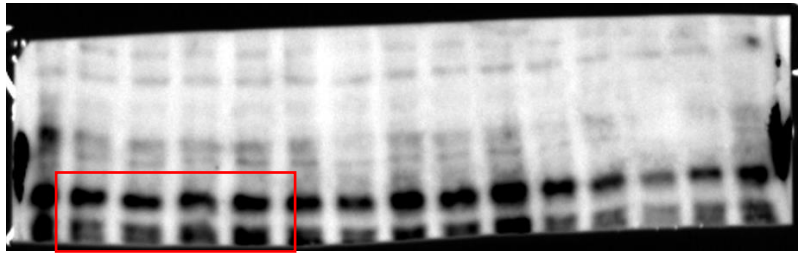

GAPDH

Full unedited gel for Figure S6C

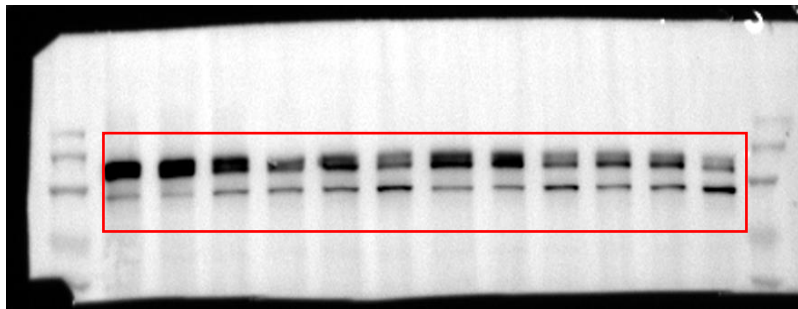

ADAM17

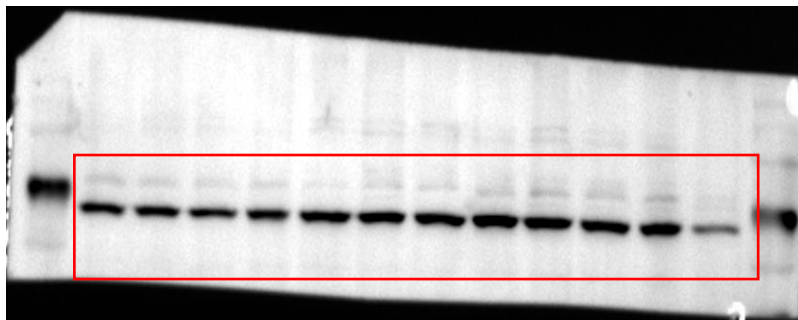

TRIM47

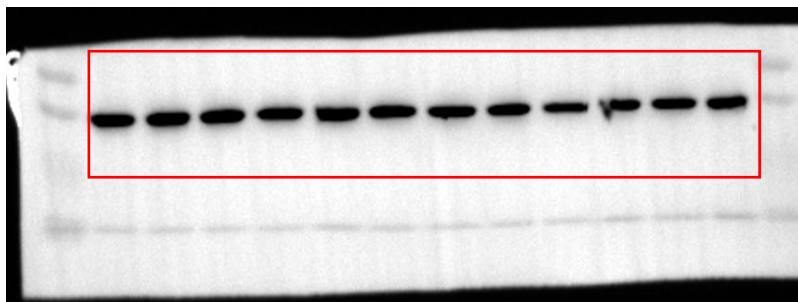

GAPDH

Full unedited gel for Figure S6F

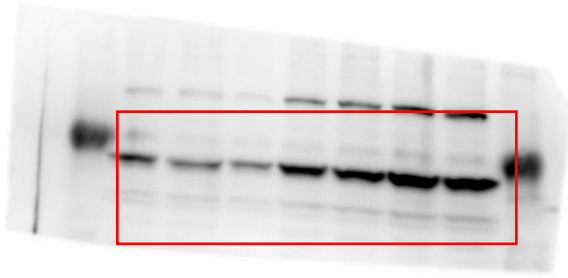

TRIM47

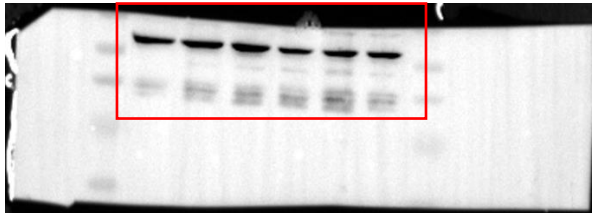

GAPDH

**Full unedited gel for Figure S6G**

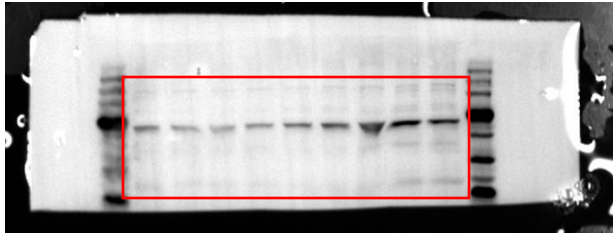

TRIM47

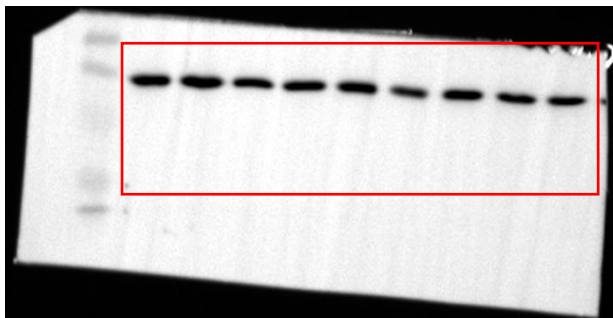

GAPDH
